# Supplementary material for: UPF1 promotes the formation of R loops to stimulate DNA double-strand break repair
Source: PubMed Central journal article supplement (PMC8219777; doi:10.1038/s41467-021-24201-w), 2021-06-22
Supplement: 41467_2021_24201_MOESM1_ESM.pdf [file 41467_2021_24201_MOESM1_ESM.pdf]

# **UPF1 promotes the formation of R loops to stimulate DNA double-strand break repair**

Greg H.P. Ngo, Julia W. Grimstead and Duncan M. Baird

**Supplementary information**

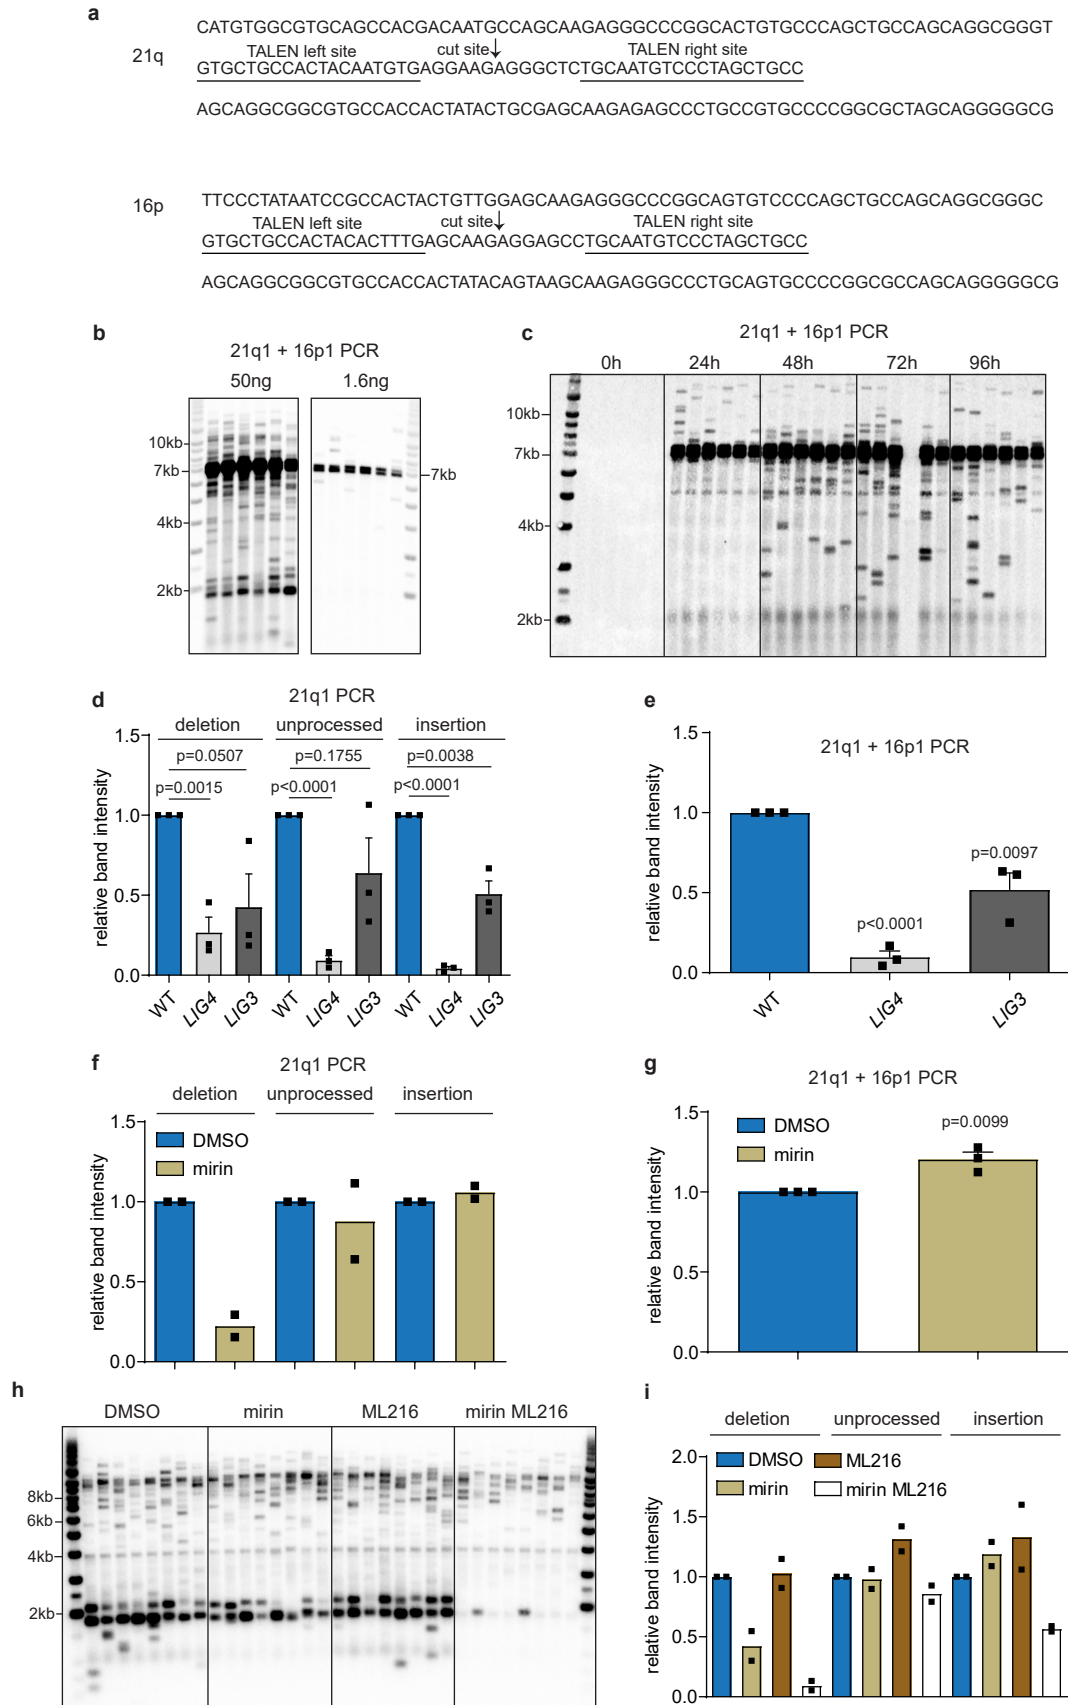

**Supplementary Figure 1. DNA resection contributes to deletion formation at telomere fusion.** **a** The DNA sequences at the 21q and 16p subtelomeres region (from centromere towards telomeres) are shown with the TALEN recognition and cutting sites indicated. **b** 21q1+16p1 telomere fusion analysis using the indicated amount of DNA isolated from RPE1-hTERT cells 48 hours after 21q/16p TALEN nucleofection. Telomere fusion products were detected with a 21q telomere adjacent probe. **c** 21q1+16p1 telomere fusion analysis using DNA (50ng) isolated from RPE1-hTERT cells at the indicated time after 21q/16p TALEN nucleofection. Telomere fusion products were detected with a 16p telomere adjacent probe. **d,e** Bar chart showing quantification of the intensity of fusion bands (21q1 PCR in **d** and 21q1+16p1 PCR in **e**) in HCT116 WT, LIG4 KO, LIG3 KO cells (relative to values in WT). Data plotted are mean+SEM (n=3). P values were obtained using Student's t-test (unpaired 2 tailed, equal variance). **f,g** Bar chart showing quantification of the intensity of fusion bands (21q1 PCR in **f** and 21q1+16p1 PCR in **g**) in RPE1-hTERT cells treated with DMSO or mirin (relative to values in DMSO). Data plotted are mean+SEM (n=2 for **f**, n=3 for **g**). P values were obtained using Student's t-test (unpaired 2 tailed, equal variance). **h** 21q1 telomere fusion assay using DNA isolated from RPE1 cells treated with DMSO, 50uM mirin or/and 50uM ML216 48 hours after nucleofection. **i** Bar chart showing quantification of the intensity of fusion bands in RPE1-hTERT cells treated with DMSO or the indicated inhibitors (relative to values in DMSO). Data plotted are means (n=2). P values were obtained using Student's t-test (unpaired 2 tailed, equal variance). The n values indicate the number of independent experiments in all cases.

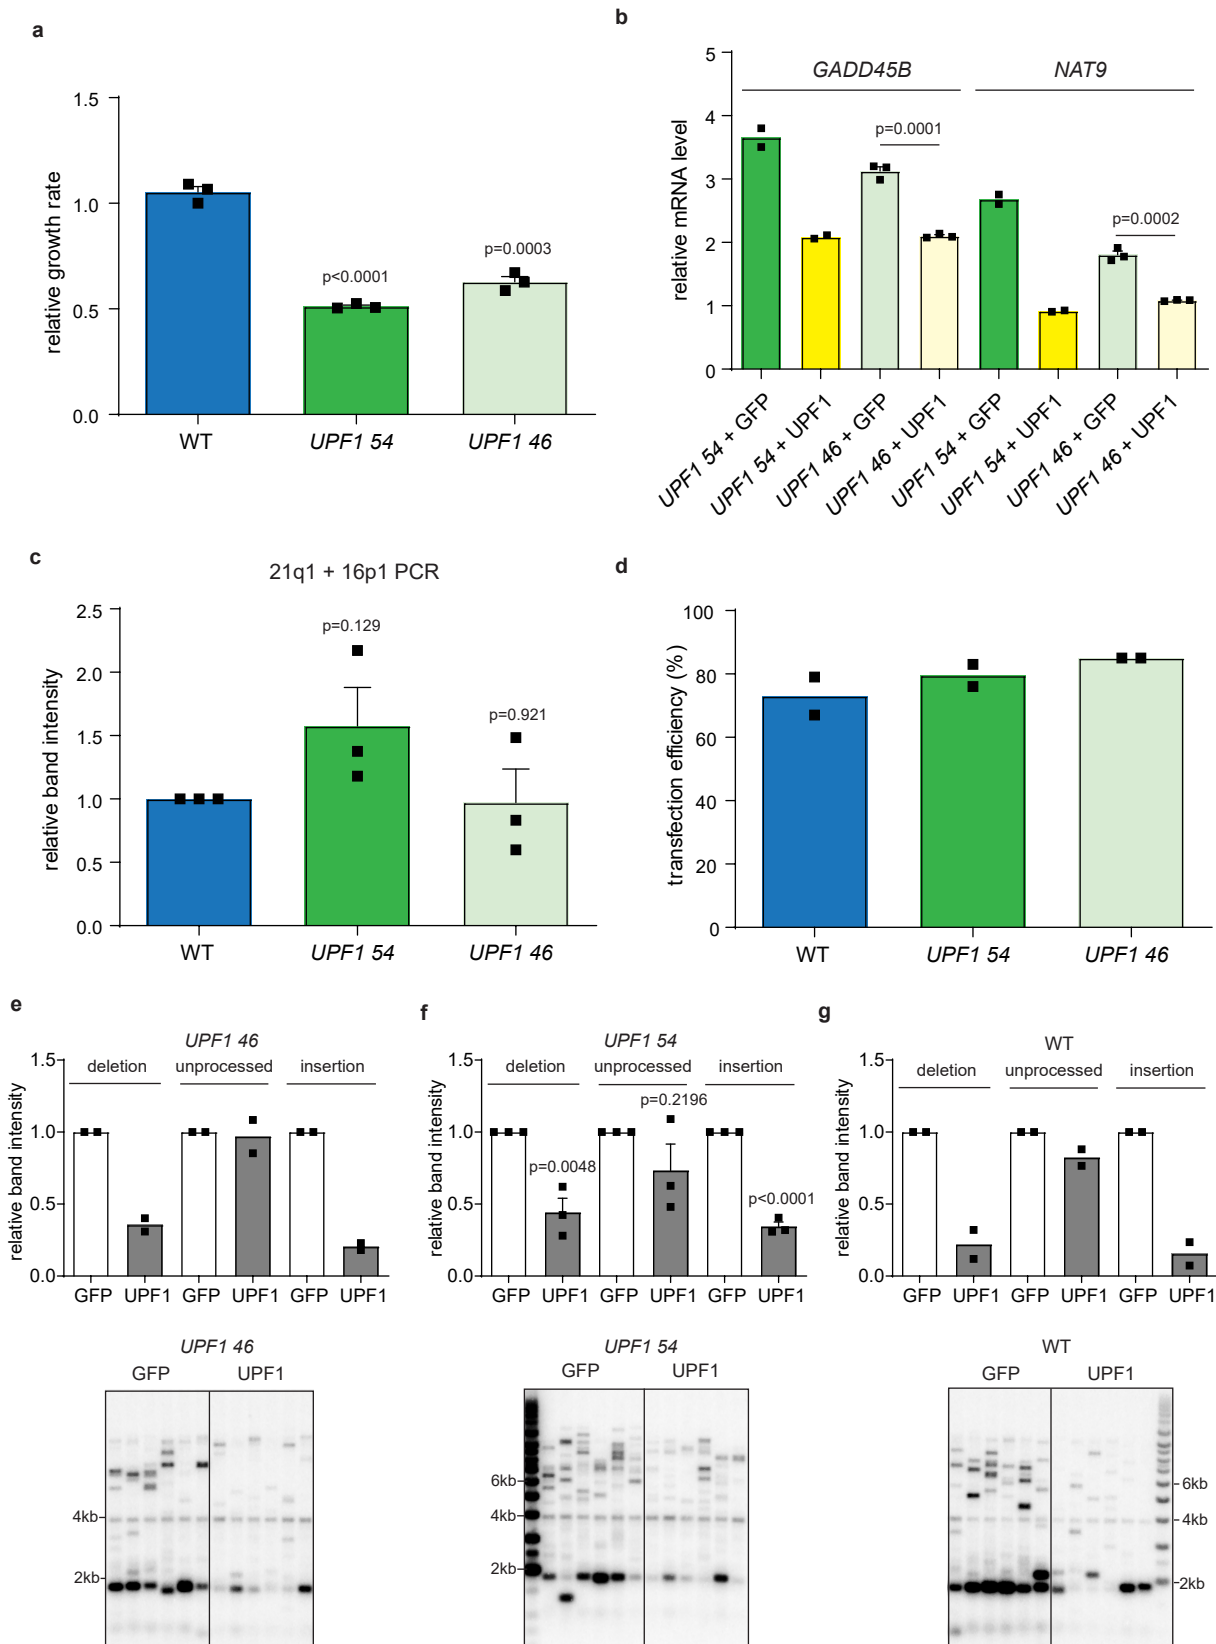

**Supplementary Figure 2. UPF1 is involved in promoting telomere deletion.** **a** Growth rate of RPE1-hTERT WT and *UPF1* KO cells (relative to the WT). Data plotted are means + SEM (n=3). P values were obtained using Student's t-test (unpaired 2 tailed, equal variance). **b** RT-qPCR analysis showing the mRNA level of two NMD markers *GADD45B* and *NAT9* in *UPF1* KO cells expressing UPF1 or GFP control. The values shown are relative to the values in WT cells and normalised with the mRNA level of *GAPDH*. Data plotted are means + SEM (n=3 for UPF1 46, n=2 for UPF1 54). P values were obtained using Student's t-test (unpaired, 2 tailed, equal variance). **c** Bar chart showing quantification of the intensity of fusion bands in RPE1-hTERT WT and *UPF1* KO cells (relative to values in WT). Data plotted are mean+SEM (n=3). P values were obtained using Student's t-test (unpaired 2 tailed, equal variance). **d** Transfection efficiency of RPE1-hTERT WT and *UPF1* KO cells. Data plotted are means (n=2). **e-g** 21q1 telomere fusion assay using DNA isolated from RPE1 WT or *UPF1* KO cells expressing UPF1 or GFP control and bar chart showing quantification of the intensity of fusion bands. Data plotted are mean+SEM (n=2 for e and g, n=3 for f). P values were obtained using Student's t-test (unpaired 2 tailed, equal variance). The n values indicate the number of independent experiments in all cases.

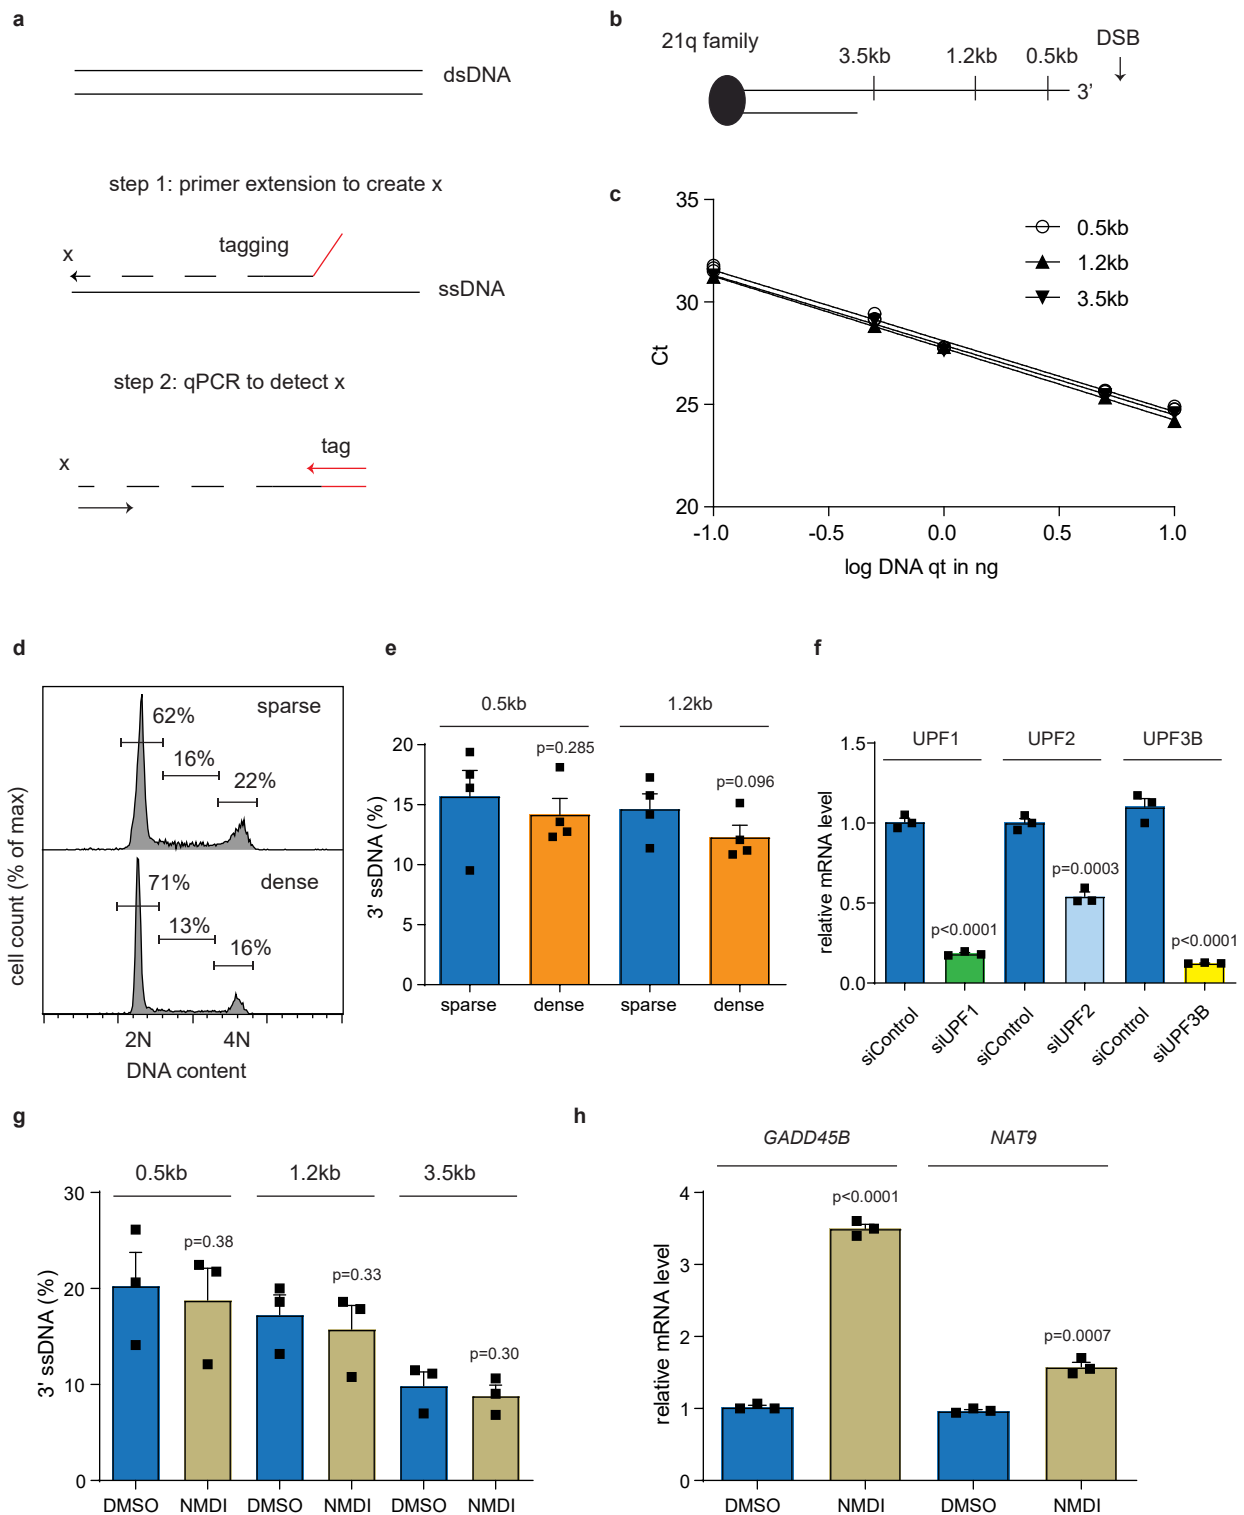

**Supplementary Figure 3. UPF1 stimulates DNA resection at sub-telomeric DSBs independently of NMD.** **a** Diagram showing how QAOS assay quantifies ssDNA. In step one, a tagging primer, containing locus specific sequence and an artificial tag sequence, binds to ssDNA but not to dsDNA. Ex Taq polymerase extends the tagging primer to create a hybrid with the tag sequence incorporated during a slow ramp from 40 to 72°C. The amount of this tagged hybrid is proportional to the initial amount of ssDNA. In step two, this hybrid sequence is quantified using stringent qPCR reaction containing the tag primer, a forward/reverse primer and a Taqman probe. **b** Diagram showing QAOS assay to detect 3' ssDNA at three loci located at 0.5kb, 1.2kb and 3.5kb from TALEN cleavage site. **c** Threshold cycle (Ct) values were obtained from QAOS qPCR for the indicated loci and plotted against the log value of the amount of boiled DNA to generate a standard curve. **d** Cell cycle analysis of RPE1-hTERT WT cells (sparse or dense) with the level of G1, S and G2/M cells indicated. **e** QAOS analysis showing the level of 3' ssDNA at the indicated loci in RPE1-hTERT WT cells (sparse or dense) at 10 hours after 21q/16p TALEN nucleofection. Data plotted are means + SEM (n=4). P values were obtained using Student's t-test (unpaired 1 tailed, equal variance). **f** RT-qPCR analysis showing the mRNA level of *UPF1/UPF2/UPF3B* in RPE1-hTERT WT cells transfected with UPF1, UPF2, UPF3B or control siRNAs. The values shown are relative to the values in siControl and normalised with the mRNA level of *GAPDH*. Data plotted are means + SEM (n=3). P values were obtained using Student's t-test (unpaired, 2 tailed, equal variance). **g** QAOS analysis showing the level of 3' ssDNA at the indicated loci in RPE1-hTERT WT cells treated with DMSO or NMDI14 at 10 hours after 21q/16p TALEN nucleofection. Data plotted are means + SEM (n=3). P values were obtained using Student's t-test (unpaired 1 tailed, equal variance). **h** RT-qPCR analysis showing the mRNA level of two NMD markers *GADD45B* and *NAT9* in RPE1-hTERT WT cells treated with DMSO or NMDI14. The values shown are relative to the values in DMSO and normalised with the mRNA level of *GAPDH*. Data plotted are means + SEM (n=3). P values were obtained using Student's t-test (unpaired 2 tailed, equal variance). The n values indicate the number of independent experiments in all cases.

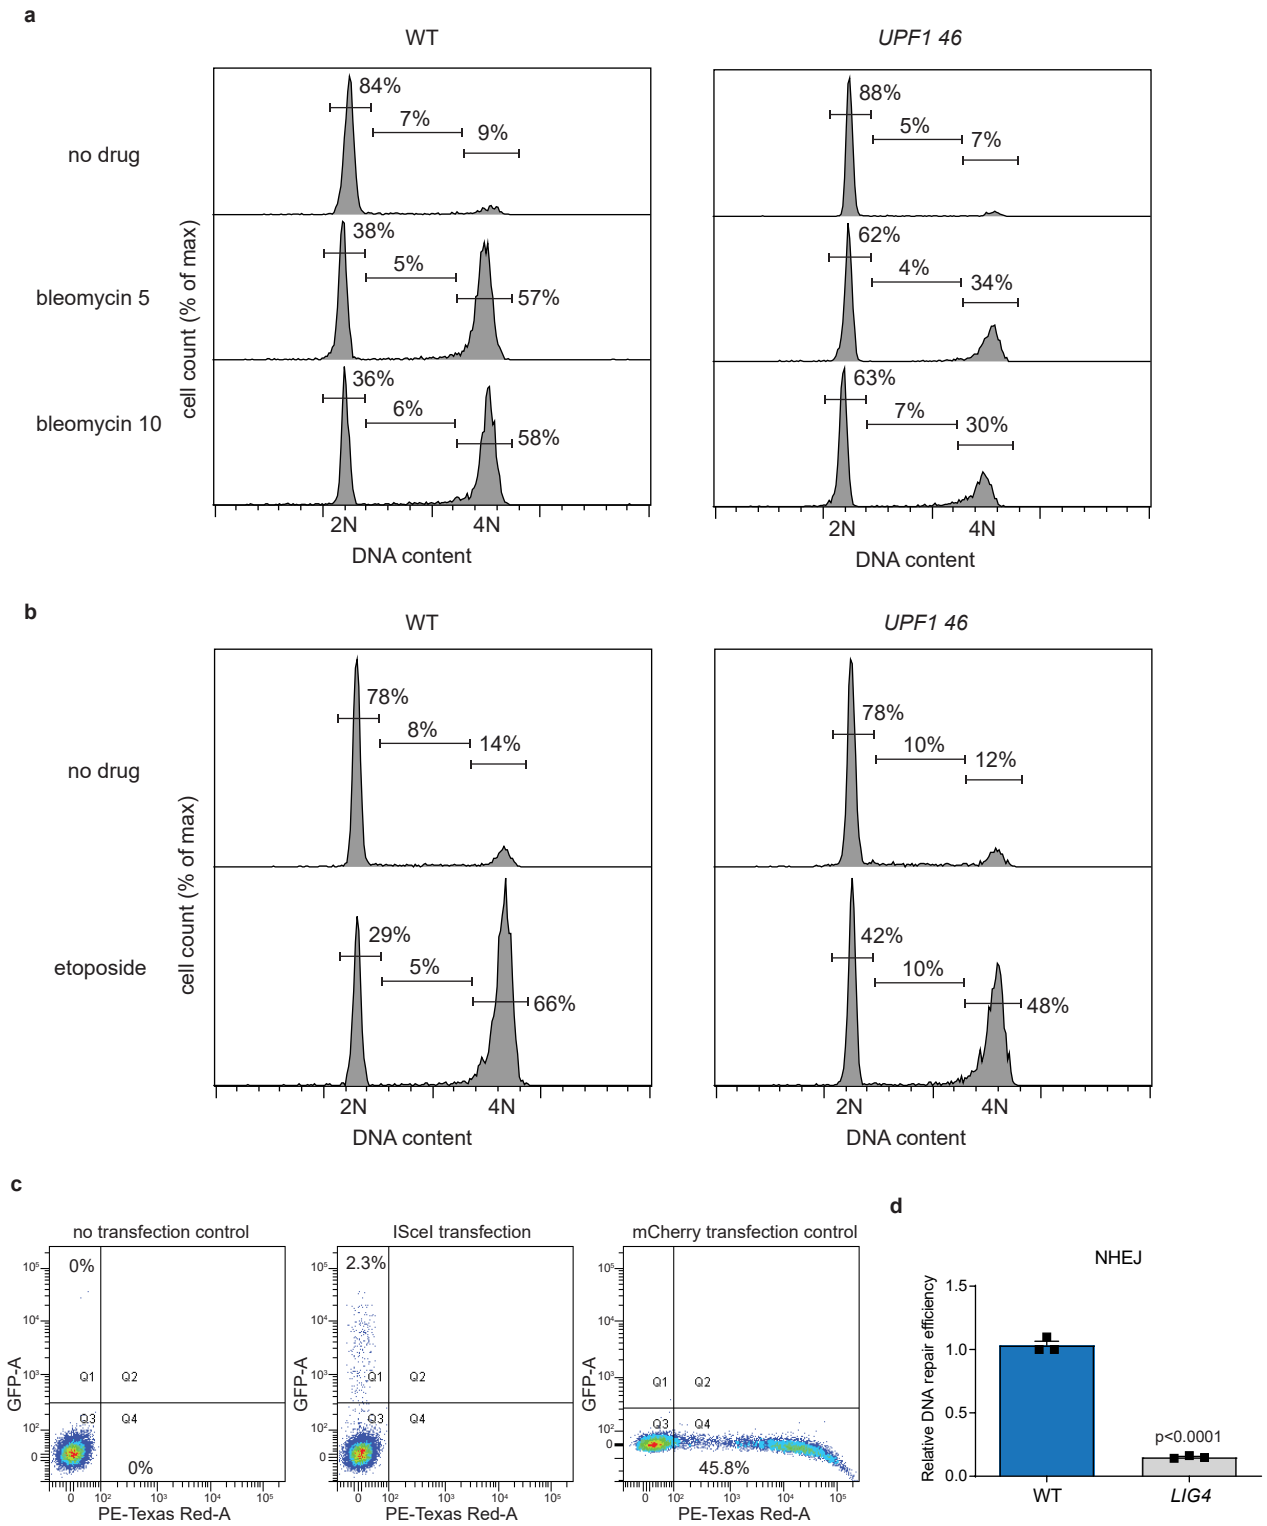

**Supplementary Figure 4. UPF1 stimulates repair of non-telomeric DNA damage.** **a,b** Cell cycle analysis of RPE1-hTERT WT and *UPF1* KO cells untreated or treated with 5 $\mu$ g/ml or 10 $\mu$ g/ml bleomycin for 2 days (a) or with 1 $\mu$ M etoposide for 2 days (b) with the level of G1, S and G2/M cells indicated. **c** Flow cytometry data showing induction of GFP expression following transfection of IScel plasmid into U2OS SA-GFP cells. **d** Analysis of NHEJ activity in HCT116 WT or *LIG4* KO cells. Data plotted are means + SEM (n=3 independent experiments). P values were obtained using Student's t-test (unpaired 2 tailed, equal variance).

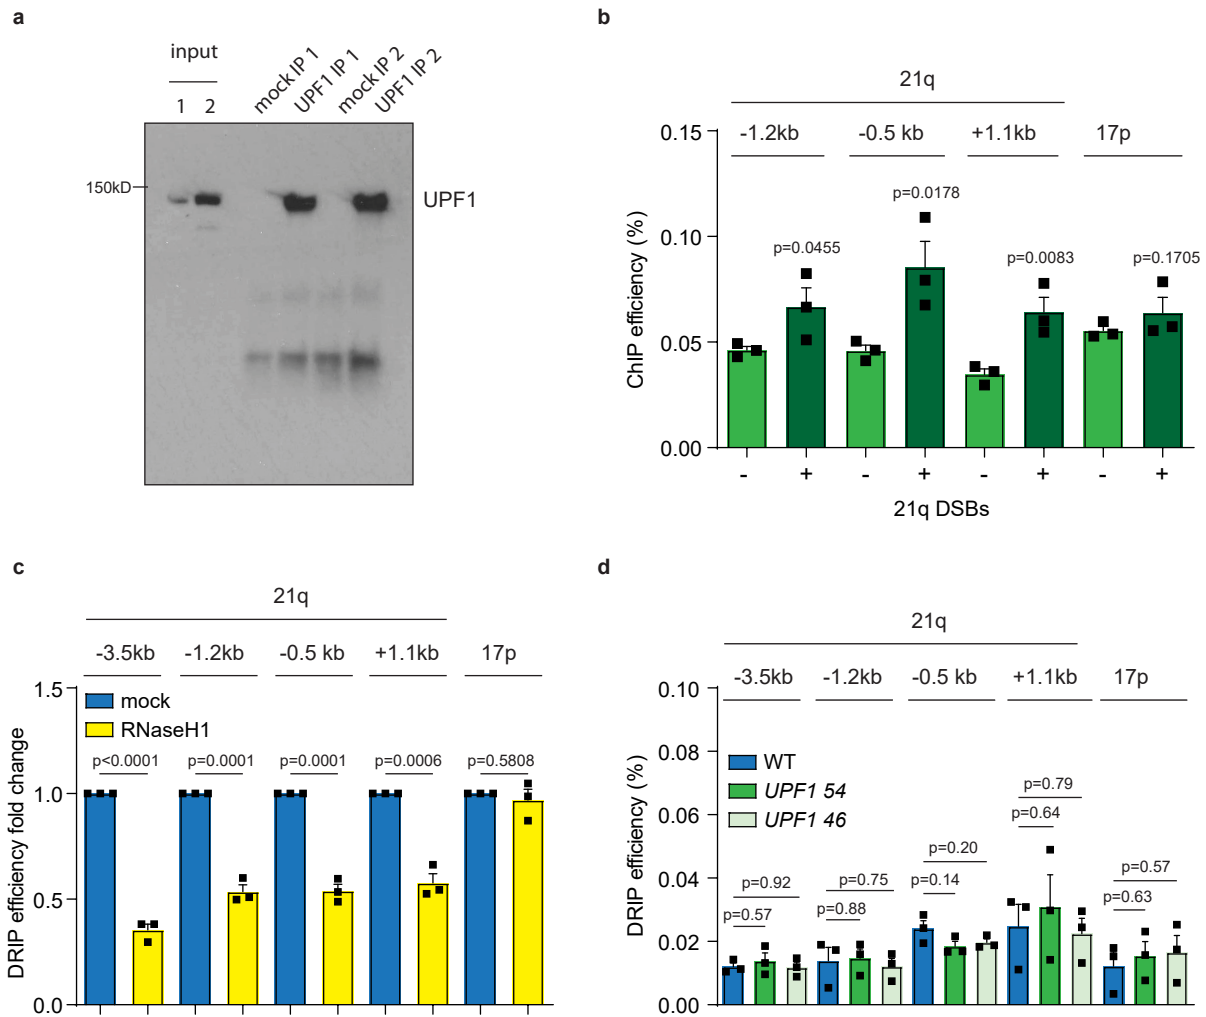

**Supplementary Figure 5. UPF1 promotes DNA-RNA hybrid formation at sub-telomeric DSBs.** **a** Immunoprecipitation of UPF1 from RPE1-hTERT cell extracts using anti UPF1 antibody or a mock antibody. Two independent immunoprecipitation experiments are shown. **b** ChIP analysis of UPF1 binding to sub-telomeres with or without DSB induction (at 5 hours after 21q/16p TALEN nucleofection). Data plotted are means + SEM (n=3). P values were obtained using Student's t-test (unpaired 1 tailed, equal variance). **c,d** DRIP analysis showing the levels of DNA-RNA hybrids at the indicated loci in RPE1-hTERT WT cells after in vitro digest with RNaseH1 or mock treated (c) or in RPE1-hTERT WT and *UPF1* KO cells in the absence of DSBs (d). Data plotted are means + SEM (n=3). P values were obtained using Student's t-test (unpaired 2 tailed, equal variance). The n values indicate the number of independent experiments in all cases.

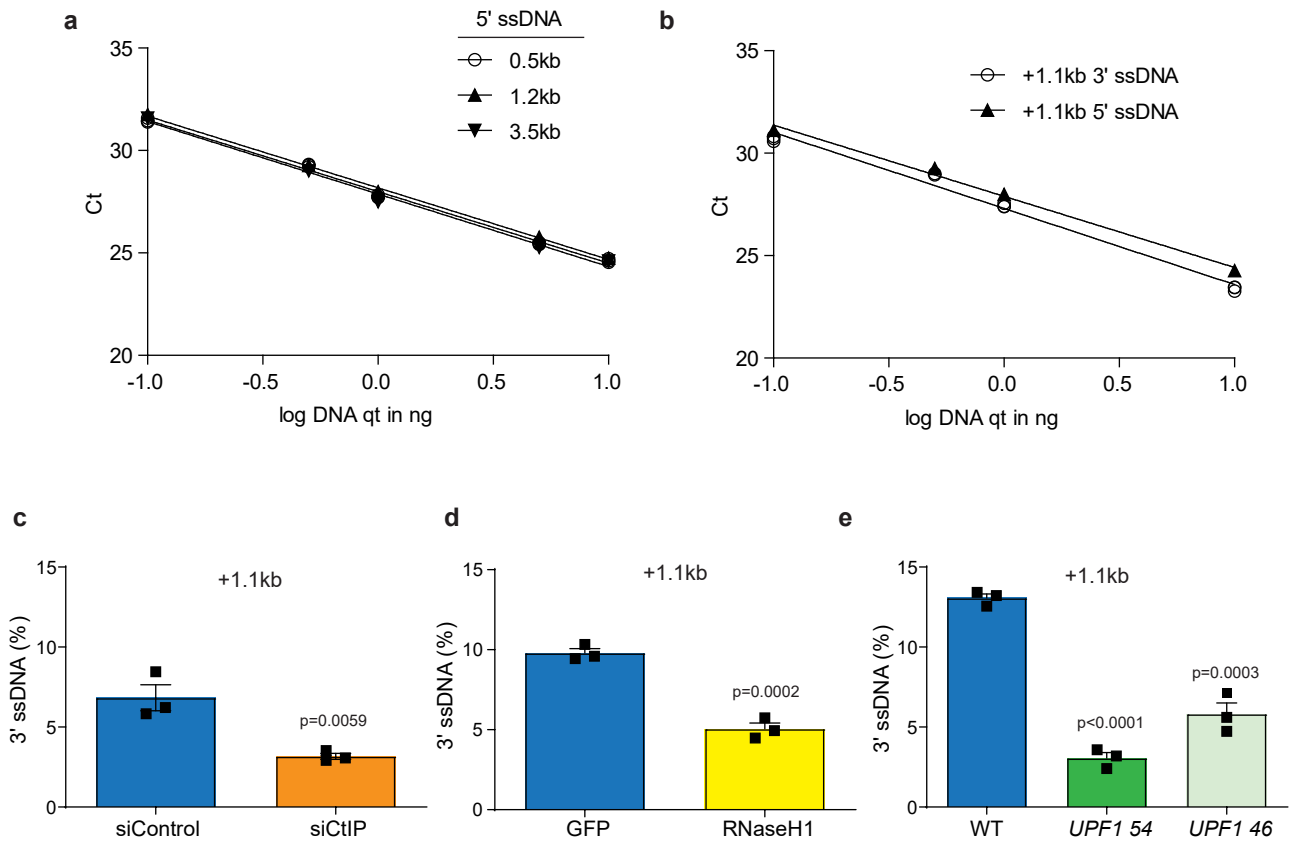

**Supplementary Figure 6. UPF1 stimulates R loop formation at sub-telomeric DSBs.** **a,b** Development of QAOS assay in RPE1-hTERT cells. Threshold cycle (Ct) values were obtained from QAOS qPCR for the indicated loci and plotted against the log value of the amount of boiled DNA to generate a standard curve. **c-e** QAOS analysis showing the level of 3' ssDNA at the indicated loci in RPE1-hTERT cells transfected with CtIP or control siRNAs (**c**), RPE1-hTERT cells expressing RNaseH1 or GFP (**d**) and RPE1-hTERT WT and *UPF1* KO cells (**e**) at 10 hours after 21q/16p TALENs nucleofection. Data plotted are means + SEM (n=3 independent experiments). P values were obtained using Student's t-test (unpaired 1 tailed, equal variance).

| Primer                                      | Sequence (5'-3')                       |
|---------------------------------------------|----------------------------------------|
| 21q1                                        | CTTGGTGTGCGAGAGAGGTAG                  |
| 16p1                                        | TGGACTTCTCACTTCTAGGGCAG                |
| 10q21T                                      | GTA CTGCCTGCCTTTGGGAT                  |
| M449                                        | GTA CTGCATGGCTTTGGGAC                  |
| Teltail                                     | TGCTCCGTGCATCTGGGCATC                  |
| Telorette 2                                 | TGCTCCGTGCATCTGGGCATCTAACCCCT          |
| 21q -0.5kb 3' tagging                       | GATCTCGAGCTCGATATCGGATCCATTGAGGTACATGT |
| 21q -0.5kb 3' forward                       | AGAGGCAGCTGCAGTAGATACAAACG             |
| 21q -0.5kb 3' reverse tag                   | GATCTCGAGCTCGATATC GGATCCATT           |
| 21q -0.5kb 5' tagging                       | CAGCGCAGCGGCATGAGGCAGCTGCA             |
| 21q -0.5kb 5' reverse                       | TGGGACCTCCTCACTGTTGATTGA               |
| 21q -0.5kb 5' forward tag                   | CAGCGCAGCGGCATGAG                      |
| 21q -0.5kb 3'/5' Taqman probe               | CCGAATCCA CTCTGGCACCAGCCTCCTTC         |
| 21q -1.2kb 3' tagging                       | AAGGAGCGCAGCGCCTGTACCACTCCAGCACT       |
| 21q -1.2kb 3' forward                       | CAGGATAGTG GGCTCTGTTAGAGTAGATAGC       |
| 21q -1.2kb 3' reverse tag                   | AAGGAGCGCAGCGCCTGTACCA                 |
| 21q -1.2kb 5' tagging                       | CAGCGCAGCGGCATGAGCTCCTGGAAAA           |
| 21q -1.2kb 5' reverse                       | CATCCA CTCCAGCACTAGAGATGCTACT          |
| 21q -1.2kb 5' forward tag                   | CAGCGCAGCGGCATGAG                      |
| 21q -1.2kb 3'/5' Taqman probe               | TCTGTGAAGGCTCACCTGGAGGGACCACCA         |
| 21q -3.5kb 3' tagging                       | TGCCCTCGCATCGCTCTCGAAGCATCTGTTTC       |
| 21q -3.5kb 3' forward                       | CCACCCACCCAGTGAGAGATTTATT              |
| 21q -3.5kb 3' reverse tag                   | TGCCCTCGCATCGCTCTCGAA                  |
| 21q -3.5kb 5' tagging                       | CAGCGCAG CGGCATGAGATTATTTTCTA          |
| 21q -3.5kb 5' reverse                       | CCTTTACCTCCTCCTTGAAGCATCTG             |
| 21q -3.5kb 5' forward tag                   | CAGCGCAGCGGCATGAG                      |
| 21q -3.5kb 3'/5' Taqman probe               | TGACAGGCTGGGAAGCATAGCCTCCAGCCA         |
| 21q +1.1kb 3' tagging                       | CAGCGCAGCGGCATGAGTTCTTCTCAG            |
| 21q +1.1kb 3' forward                       | GAATGCTGCTCCGCCTTACG                   |
| 21q +1.1kb 3' reverse tag                   | CAGCGCAGCGGCATGAG                      |
| 21q +1.1kb 5' tagging                       | CAGCGCAGCGGCATCTGCTCCGCCTT             |
| 21q +1.1kb 5' reverse                       | GGAGCAGAGTTCTTCTCAGGTCAG               |
| 21q +1.1kb 5' forward tag                   | CAGCGCAGCGGCATCTG                      |
| 21q +1.1kb 3'/5' Taqman probe               | TGCTGAACAGAACACAGCTCCGCCCTCGCA         |
| ch1 dsDNA control forward <sup>1</sup>      | TGAGGAGGTGACATTAGA AACTCAGA            |
| ch1 dsDNA control reverse <sup>1</sup>      | AGGACTCACTTACACGGCCTTT                 |
| ch1 dsDNA control Taqman probe <sup>1</sup> | TTGCAAGGCTGCTTCTTACCATTCAA             |
| 17p control forward                         | CCCGCACCTCCTCACCTCATC                  |
| 17p control reverse                         | GCTTAGCTGAAGGGAACATACAGGCTCTT          |
| 21p control forward                         | CTGAAACTGGATCCCTTCTTAC                 |
| 21p control reverse                         | CTTGCCCATGCCTAAGTTCT                   |
| UPF1 RTqPCR forward                         | TGGTTAAGAGACATGCGGCT                   |
| UPF1 RTqPCR reverse                         | CTCATCGCCATAATTATCAGGGACC              |
| UPF2 RTqPCR forward                         | AGTCAAGCTGAGGGCATCGG                   |
| UPF2 RTqPCR reverse                         | TATGTGACCCAGGACAATCAGCG                |
| UPF3B RTqPCR forward                        | AAGAAACAAGGATCGTCCAGCG                 |
| UPF3B RTqPCR reverse                        | GCTAATACCACTTTCCTGCTTCC                |
| GADD45B RTqPCR forward                      | ATCAACATCGTGCGGGTGTC                   |
| GADD45B RTqPCR reverse                      | GTGTGAGGGTTCTGTGACCAG                  |
| NAT9 RTqPCR forward <sup>2</sup>            | GACCCTGGAGCAGGAGTATG                   |
| NAT9 RTqPCR reverse <sup>2</sup>            | CCACCATGCAGCTCTCTTC                    |
| GAPDH RTqPCR forward                        | CCGCATCTTCTTTTGGCTCG                   |
| GAPDH RTqPCR reverse                        | GCCCAATACGACCAAATCCGT                  |

**Supplementary Table 1. Sequences of the primers used in this study.**

1 Zhou, Y., Caron, P., Legube, G. & Paull, T. T. Quantitation of DNA double-strand break resection intermediates in human cells. *Nucleic Acids Res* 42, e19, doi:10.1093/nar/gkt1309 (2014).

2 Tani, H. et al. Identification of hundreds of novel UPF1 target transcripts by direct determination of whole transcriptome stability. *RNA Biol* 9, 1370-1379, doi:10.4161/rna.22360 (2012).
