# Supplementary material for: UPF1 promotes the formation of R loops to stimulate DNA double-strand break repair
Source: PubMed Central journal article supplement (PMC8219777; doi:10.1038/s41467-021-24201-w), 2021-06-22
Supplement: 41467_2021_24201_MOESM3_ESM.pdf [file 41467_2021_24201_MOESM3_ESM.pdf]

## Reporting Summary

Nature Research wishes to improve the reproducibility of the work that we publish. This form provides structure for consistency and transparency in reporting. For further information on Nature Research policies, see our [Editorial Policies](#) and the [Editorial Policy Checklist](#).

### Statistics

For all statistical analyses, confirm that the following items are present in the figure legend, table legend, main text, or Methods section.

n/a Confirmed

- The exact sample size ( $n$ ) for each experimental group/condition, given as a discrete number and unit of measurement
- A statement on whether measurements were taken from distinct samples or whether the same sample was measured repeatedly
- The statistical test(s) used AND whether they are one- or two-sided  
*Only common tests should be described solely by name; describe more complex techniques in the Methods section.*
- A description of all covariates tested
- A description of any assumptions or corrections, such as tests of normality and adjustment for multiple comparisons
- A full description of the statistical parameters including central tendency (e.g. means) or other basic estimates (e.g. regression coefficient) AND variation (e.g. standard deviation) or associated estimates of uncertainty (e.g. confidence intervals)
- For null hypothesis testing, the test statistic (e.g.  $F$ ,  $t$ ,  $r$ ) with confidence intervals, effect sizes, degrees of freedom and  $P$  value noted  
*Give  $P$  values as exact values whenever suitable.*
- For Bayesian analysis, information on the choice of priors and Markov chain Monte Carlo settings
- For hierarchical and complex designs, identification of the appropriate level for tests and full reporting of outcomes
- Estimates of effect sizes (e.g. Cohen's  $d$ , Pearson's  $r$ ), indicating how they were calculated

*Our web collection on [statistics for biologists](#) contains articles on many of the points above.*

### Software and code

Policy information about [availability of computer code](#)

Data collection

NC-3000™ NucleoView v2.1 (Chemometec)  
BD FACSDiva™ 8.0.1 Software (BD Biosciences)  
ImageQuant TL Software v8.1 (GE Healthcare)  
ViiA™ 7 v1.2.3 Software (Thermo Fisher Scientific)  
QuantStudio v1.3 Software (Thermo Fisher Scientific)

Data analysis

NC-3000™ NucleoView v2.1 (Chemometec)  
GraphPad Prism 5 (GraphPad Software)  
BD FACSDiva™ 8.0.1 Software (BD Biosciences)  
Flowjo v10 (BD Biosciences)  
Applied Biosystems qPCR Analysis Modules (Thermo Fisher Scientific)  
Image J v1.52, open source: <https://imagej.nih.gov/ij/index.html>  
ImageQuant TL Software v8.1 (GE Healthcare)  
Microsoft Excel v16 (Microsoft)  
Adobe Photoshop CS v5.1 (Adobe)  
CRISPR Finder online tool (Wellcome Sanger Institute Genome Editing website)

For manuscripts utilizing custom algorithms or software that are central to the research but not yet described in published literature, software must be made available to editors and reviewers. We strongly encourage code deposition in a community repository (e.g. GitHub). See the Nature Research [guidelines for submitting code & software](#) for further information.

## Data

Policy information about [availability of data](#)

All manuscripts must include a [data availability statement](#). This statement should provide the following information, where applicable:

- Accession codes, unique identifiers, or web links for publicly available datasets
- A list of figures that have associated raw data
- A description of any restrictions on data availability

All data generated in this study are included in this article. Source data are provided with this paper.

## Field-specific reporting

Please select the one below that is the best fit for your research. If you are not sure, read the appropriate sections before making your selection.

- Life sciences       Behavioural & social sciences       Ecological, evolutionary & environmental sciences

For a reference copy of the document with all sections, see [nature.com/documents/nr-reporting-summary-flat.pdf](https://www.nature.com/documents/nr-reporting-summary-flat.pdf)

## Life sciences study design

All studies must disclose on these points even when the disclosure is negative.

|                 |                                                                                                                                                                                                                                                                                                                                                                                                                                                                                                         |
|-----------------|---------------------------------------------------------------------------------------------------------------------------------------------------------------------------------------------------------------------------------------------------------------------------------------------------------------------------------------------------------------------------------------------------------------------------------------------------------------------------------------------------------|
| Sample size     | Sample-size calculation were not performed. Experiments were repeated for 2-5 times, based on similar studies in the field below:<br><br>D'Alessandro, G. et al. BRCA2 controls DNA:RNA hybrid level at DSBs by mediating RNase H2 recruitment. Nat Commun 9, 5376, doi:10.1038/s41467-018-07799-2 (2018).<br>Cohen, S. et al. Senataxin resolves RNA:DNA hybrids forming at DNA double-strand breaks to prevent translocations. Nat Commun 9, 533, doi:10.1038/s41467-018-02894-w (2018).              |
| Data exclusions | qPCR value for one of the triplicate reaction from a single sample were treated as outlier and excluded if it differs by >1 Ct from other duplicates or if it differs by >0.5 Ct from other duplicates with superimposable amplification curves. This exclusion criteria were pre-established before data analysis and serves to reduce experimental error introduced by pipetting error.                                                                                                               |
| Replication     | The experiments were repeated for 2-5 times as indicated independently to confirm reproducibility. All experiments were replicated successfully except fig. 3F (siUPF3B cells grew slower than expected and there were not enough cells for TALEN transfection), fig. 4D (UPF1 54 cells grew slower than expected and there were not enough cells for the experiment), and fig.6B (DNA yield was very low for the 5 hour time point sample and there were not enough DNA for setting up qPCR reaction). |
| Randomization   | Cells were randomly allocated for the modulation of gene activity or the induction of DNA damage.                                                                                                                                                                                                                                                                                                                                                                                                       |
| Blinding        | Blinding was not performed during data collection or analysis. This is because all data were collected by machines and analysis were performed by using programs and protocols which treat all samples equally, so it is unlikely that bias can be introduced.                                                                                                                                                                                                                                          |

## Reporting for specific materials, systems and methods

We require information from authors about some types of materials, experimental systems and methods used in many studies. Here, indicate whether each material, system or method listed is relevant to your study. If you are not sure if a list item applies to your research, read the appropriate section before selecting a response.

### Materials & experimental systems

| n/a                                 | Involvement in the study                                  |
|-------------------------------------|-----------------------------------------------------------|
| <input type="checkbox"/>            | <input checked="" type="checkbox"/> Antibodies            |
| <input type="checkbox"/>            | <input checked="" type="checkbox"/> Eukaryotic cell lines |
| <input checked="" type="checkbox"/> | <input type="checkbox"/> Palaeontology and archaeology    |
| <input checked="" type="checkbox"/> | <input type="checkbox"/> Animals and other organisms      |
| <input checked="" type="checkbox"/> | <input type="checkbox"/> Human research participants      |
| <input checked="" type="checkbox"/> | <input type="checkbox"/> Clinical data                    |
| <input checked="" type="checkbox"/> | <input type="checkbox"/> Dual use research of concern     |

### Methods

| n/a                                 | Involvement in the study                           |
|-------------------------------------|----------------------------------------------------|
| <input checked="" type="checkbox"/> | <input type="checkbox"/> ChIP-seq                  |
| <input type="checkbox"/>            | <input checked="" type="checkbox"/> Flow cytometry |
| <input checked="" type="checkbox"/> | <input type="checkbox"/> MRI-based neuroimaging    |

## Antibodies

|                 |                                                                                                                                                                                                                              |
|-----------------|------------------------------------------------------------------------------------------------------------------------------------------------------------------------------------------------------------------------------|
| Antibodies used | anti-phospho-RPA32 (S4/S8) rabbit antibody, A300-245A-M, Cambridge Biosciences, clone name: polyclonal, Lot number:#8<br>anti-phospho-Chk1 (Ser345) rabbit antibody, 2348, Cell signalling, clone name: 133D3, Lot number:18 |
|-----------------|------------------------------------------------------------------------------------------------------------------------------------------------------------------------------------------------------------------------------|

anti-phospho-Chk2 (Thr68) rabbit antibody, 2661, Cell signalling, clone name: polyclonal, Lot number:11  
 anti-UPF1 goat antibody, A300-038A, Cambridge Biosciences, clone name: polyclonal, Lot number:#4  
 anti-UPF1 mouse antibody, sc-393594, Santa Cruz, clone name: C-6, Lot number:#L0513  
 anti-UPF3B rabbit antibody, A303-688A, Cambridge Biosciences, clone name: polyclonal, Lot number: #1  
 anti-actin rabbit antibody, A2066, Sigma-Aldrich, clone name: polyclonal, Lot number:#058M4812V  
 anti-ATM(S1981) mouse antibody , 200-301-400S, Cambridge Bioscience, clone name: 10H11.E12, Lot number:32182  
 anti-CHK1 mouse antibody, 2360S, Cell Signalling, clone name: 2G1D5, Lot number:3  
 anti-CHK2 rabbit antibody, ab109413, Abcam, clone name: EPR4325, Lot number:GR45022-15  
 anti-RPA32 rabbit antibody, A300-244A-M, Cambridge Bioscience, clone name:polyclonal, Lot number:#3  
 anti-ATM goat antibody, A300-136A-T, Cambridge Bioscience, clone name: polyclonal, Lot number:#2

## Validation

anti-phospho-RPA32 (S4/S8) rabbit polyclonal antibody (A300-245A-M, Cambridge Biosciences): validated by supplier and publications, see websites

<https://www.bioscience.co.uk/product~696934>

[https://www.bethyl.com/product/A300-245A/Phospho+RPA32+\(S4+S8\)+Antibody](https://www.bethyl.com/product/A300-245A/Phospho+RPA32+(S4+S8)+Antibody)

anti-phospho-Chk1 (Ser345) rabbit monoclonal antibody (2348, Cell signalling): validated by supplier and publications, see websites

<https://www.cellsignal.co.uk/products/primary-antibodies/phospho-chk1-ser345-133d3-rabbit-mab/2348>

<https://www.citeab.com/antibodies/123248-2348-phospho-chk1-ser345-133d3-rabbit-mab>

anti-phospho-Chk2 (Thr68) rabbit polyclonal antibody (2661, Cell signalling): validated by supplier and publications, see websites

<https://www.cellsignal.co.uk/products/primary-antibodies/phospho-chk2-thr68-antibody/2661>

<https://www.citeab.com/antibodies/123816-2661-phospho-chk2-thr68-antibody>

anti-UPF1 goat polyclonal antibody (A300-038A, Cambridge Biosciences): validated by supplier and publications, see websites

<https://www.bioscience.co.uk/product~69341>

<https://www.bethyl.com/product/A300-038A/RENT1+Antibody>

anti-UPF1 mouse monoclonal antibody (sc-393594, Santa Cruz): validated by supplier and publications, see website

<https://www.scbt.com/p/rent1-antibody-c-6>

anti-UPF3B rabbit polyclonal antibody (A303-688A, Cambridge Biosciences): validated by supplier and publications, see websites

<https://www.bioscience.co.uk/product~523850>

<https://www.bethyl.com/product/A303-688A/UPF3B+Antibody>

anti-actin rabbit polyclonal antibody (A2066, Sigma-Aldrich): validated by supplier and publications, see website

<https://www.sigmaaldrich.com/catalog/product/sigma/a2066?lang=en&region=GB>

anti-ATM(S1981) mouse antibody , (200-301-400S, Cambridge Bioscience): validated by supplier and publications, see website

<https://rockland-inc.com/Product.aspx?id=41061>

anti-ATM goat antibody, (A300-136A-T, Cambridge Bioscience): validated by supplier and publications, see website

<https://www.bethyl.com/product/A300-136A/ATM+Antibody>

anti-CHK1 mouse antibody, (2360S, Cell Signalling), validated by supplier and publications, see website

<https://www.cellsignal.co.uk/products/primary-antibodies/chk1-2g1d5-mouse-mab/2360>

anti-CHK2 rabbit antibody, (ab109413, Abcam) validated by supplier and publications, see website

<https://www.abcam.com/Chk2-antibody-EPR4325-ab109413.html>

anti-RPA32 rabbit antibody, (A300-244A-M, Cambridge Bioscience) validated by supplier and publications, see website

<https://www.bethyl.com/product/A300-244A/RPA32+Antibody>

## Eukaryotic cell lines

### Policy information about cell lines

#### Cell line source(s)

RPE1-hTERT human retinal pigment epithelial cell line from Prof. Eric Hendrickson (University of Minnesota, USA), originally from ATCC (Manassas)

HCT116 human colorectal carcinoma cell line from Prof. Eric Hendrickson (University of Minnesota, USA), originally from ATCC (Manassas)

U2OS human bone osteosarcoma cell line from Prof. Jeremy Stark (City of Hope Comprehensive Cancer Center, USA), originally from ATCC (Manassas)

#### Authentication

RPE1-hTERT human retinal pigment epithelial cell line were authenticated by showing similar morphology to RPE1-hTERT cells as shown on ATCC website.

HCT116 human colorectal carcinoma cell lines were authenticated in the lab by showing similar morphology to HCT116 cells as shown on ATCC website and by having expected DNA repair deficiency as described in the publication below:

<https://genome.cshlp.org/content/early/2016/03/03/gr.200840.115>

U2OS human bone osteosarcoma reporter cell lines were authenticated by showing similar morphology to U2OS cells as shown on ATCC website and by the production of GFP positive cells following the transfection of plasmids expressing IScel as described in the publication below:

[https://link.springer.com/protocol/10.1007%2F978-1-61779-998-3\\_27](https://link.springer.com/protocol/10.1007%2F978-1-61779-998-3_27)

Mycoplasma contamination

PCR test were performed when these cell lines were received and showed that all cell lines were mycoplasma negative. Test were repeated regularly which showed that all cell lines remained mycoplasma negative during the course of this study.

Commonly misidentified lines  
(See [ICLAC](#) register)

none

## Flow Cytometry

### Plots

Confirm that:

- The axis labels state the marker and fluorochrome used (e.g. CD4-FITC).
- The axis scales are clearly visible. Include numbers along axes only for bottom left plot of group (a 'group' is an analysis of identical markers).
- All plots are contour plots with outliers or pseudocolor plots.
- A numerical value for number of cells or percentage (with statistics) is provided.

### Methodology

Sample preparation

U2OS human bone osteosarcoma reporter cells (untransfected or transfected with ISceI or mCherry expressing plasmids) were trypsinised, washed once in PBS, resuspended in PBS and subjected to flow cytometry.

Instrument

BD LSRFortessa™ cell analyser (BD Biosciences)

Software

BD FACSDiva™ 8.0.1 Software (BD Biosciences)

Cell population abundance

Not applicable- experiments were performed on a single cell line.

Gating strategy

Forward versus side scatter (FSC vs SSC) and forward scatter height versus forward scatter area (FSC-H vs FSC-A) plots were used to exclude cell debris and doublets. Gating used to detect cells expressing GFP or mCherry are shown in Supplementary Fig. 4c

- Tick this box to confirm that a figure exemplifying the gating strategy is provided in the Supplementary Information.
